# Supplementary figures and images for: A molecular dynamics model for glycosylphosphatidyl-inositol anchors: “flop down” or “lollipop”?
Source: Royal Society of Chemistry journal article supplement (doi:10.1039/c8cp04059a), 2018-01-01

(a)

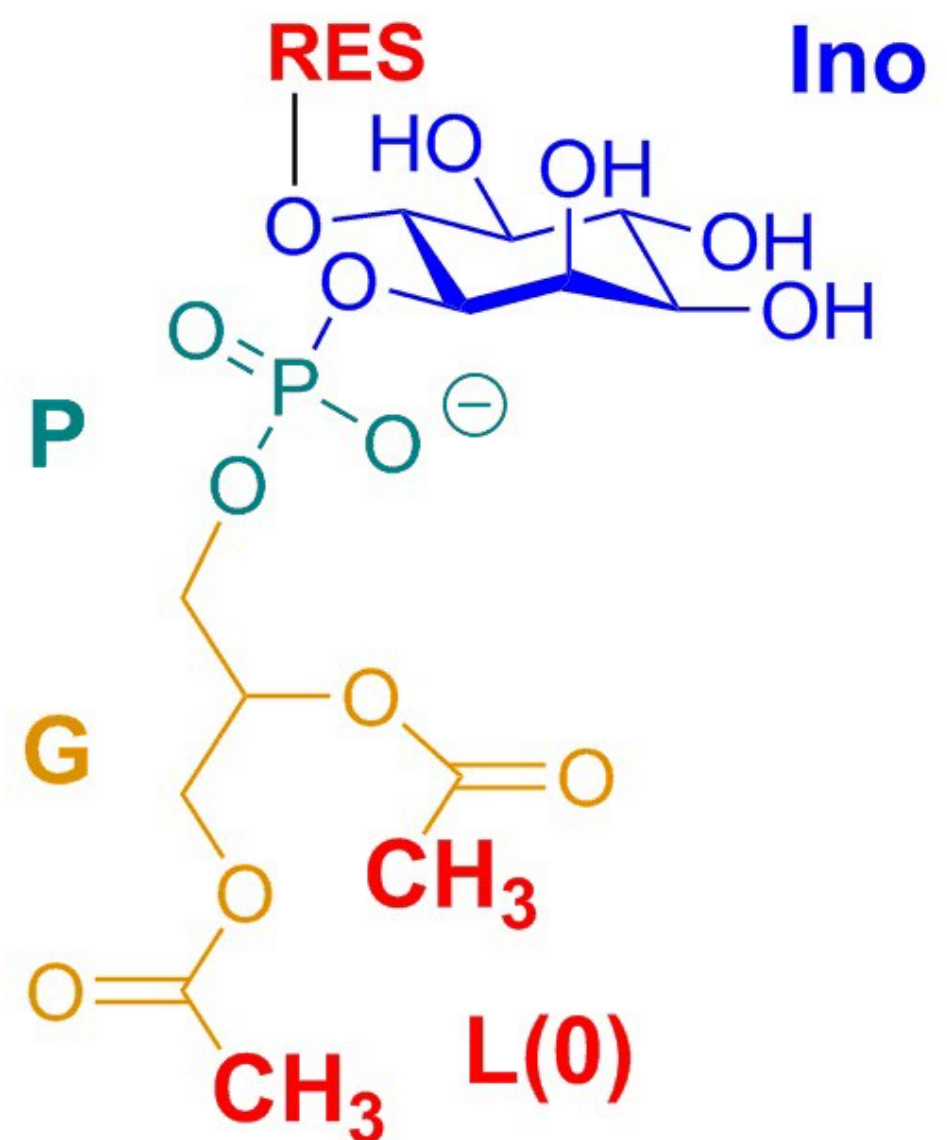

(b)

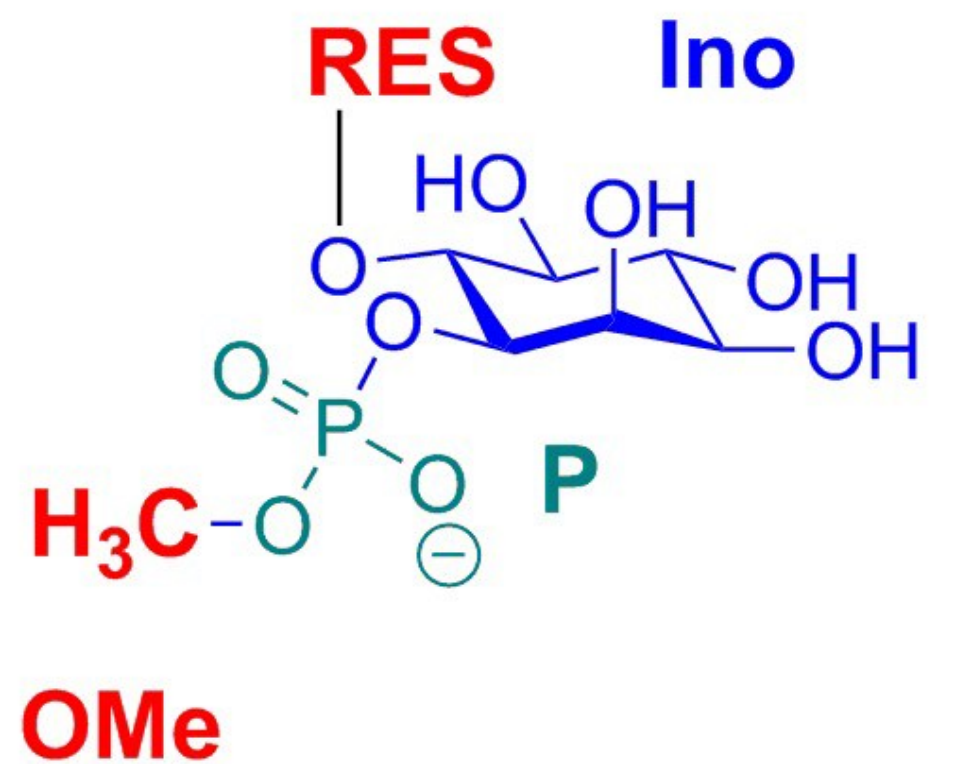

(c)

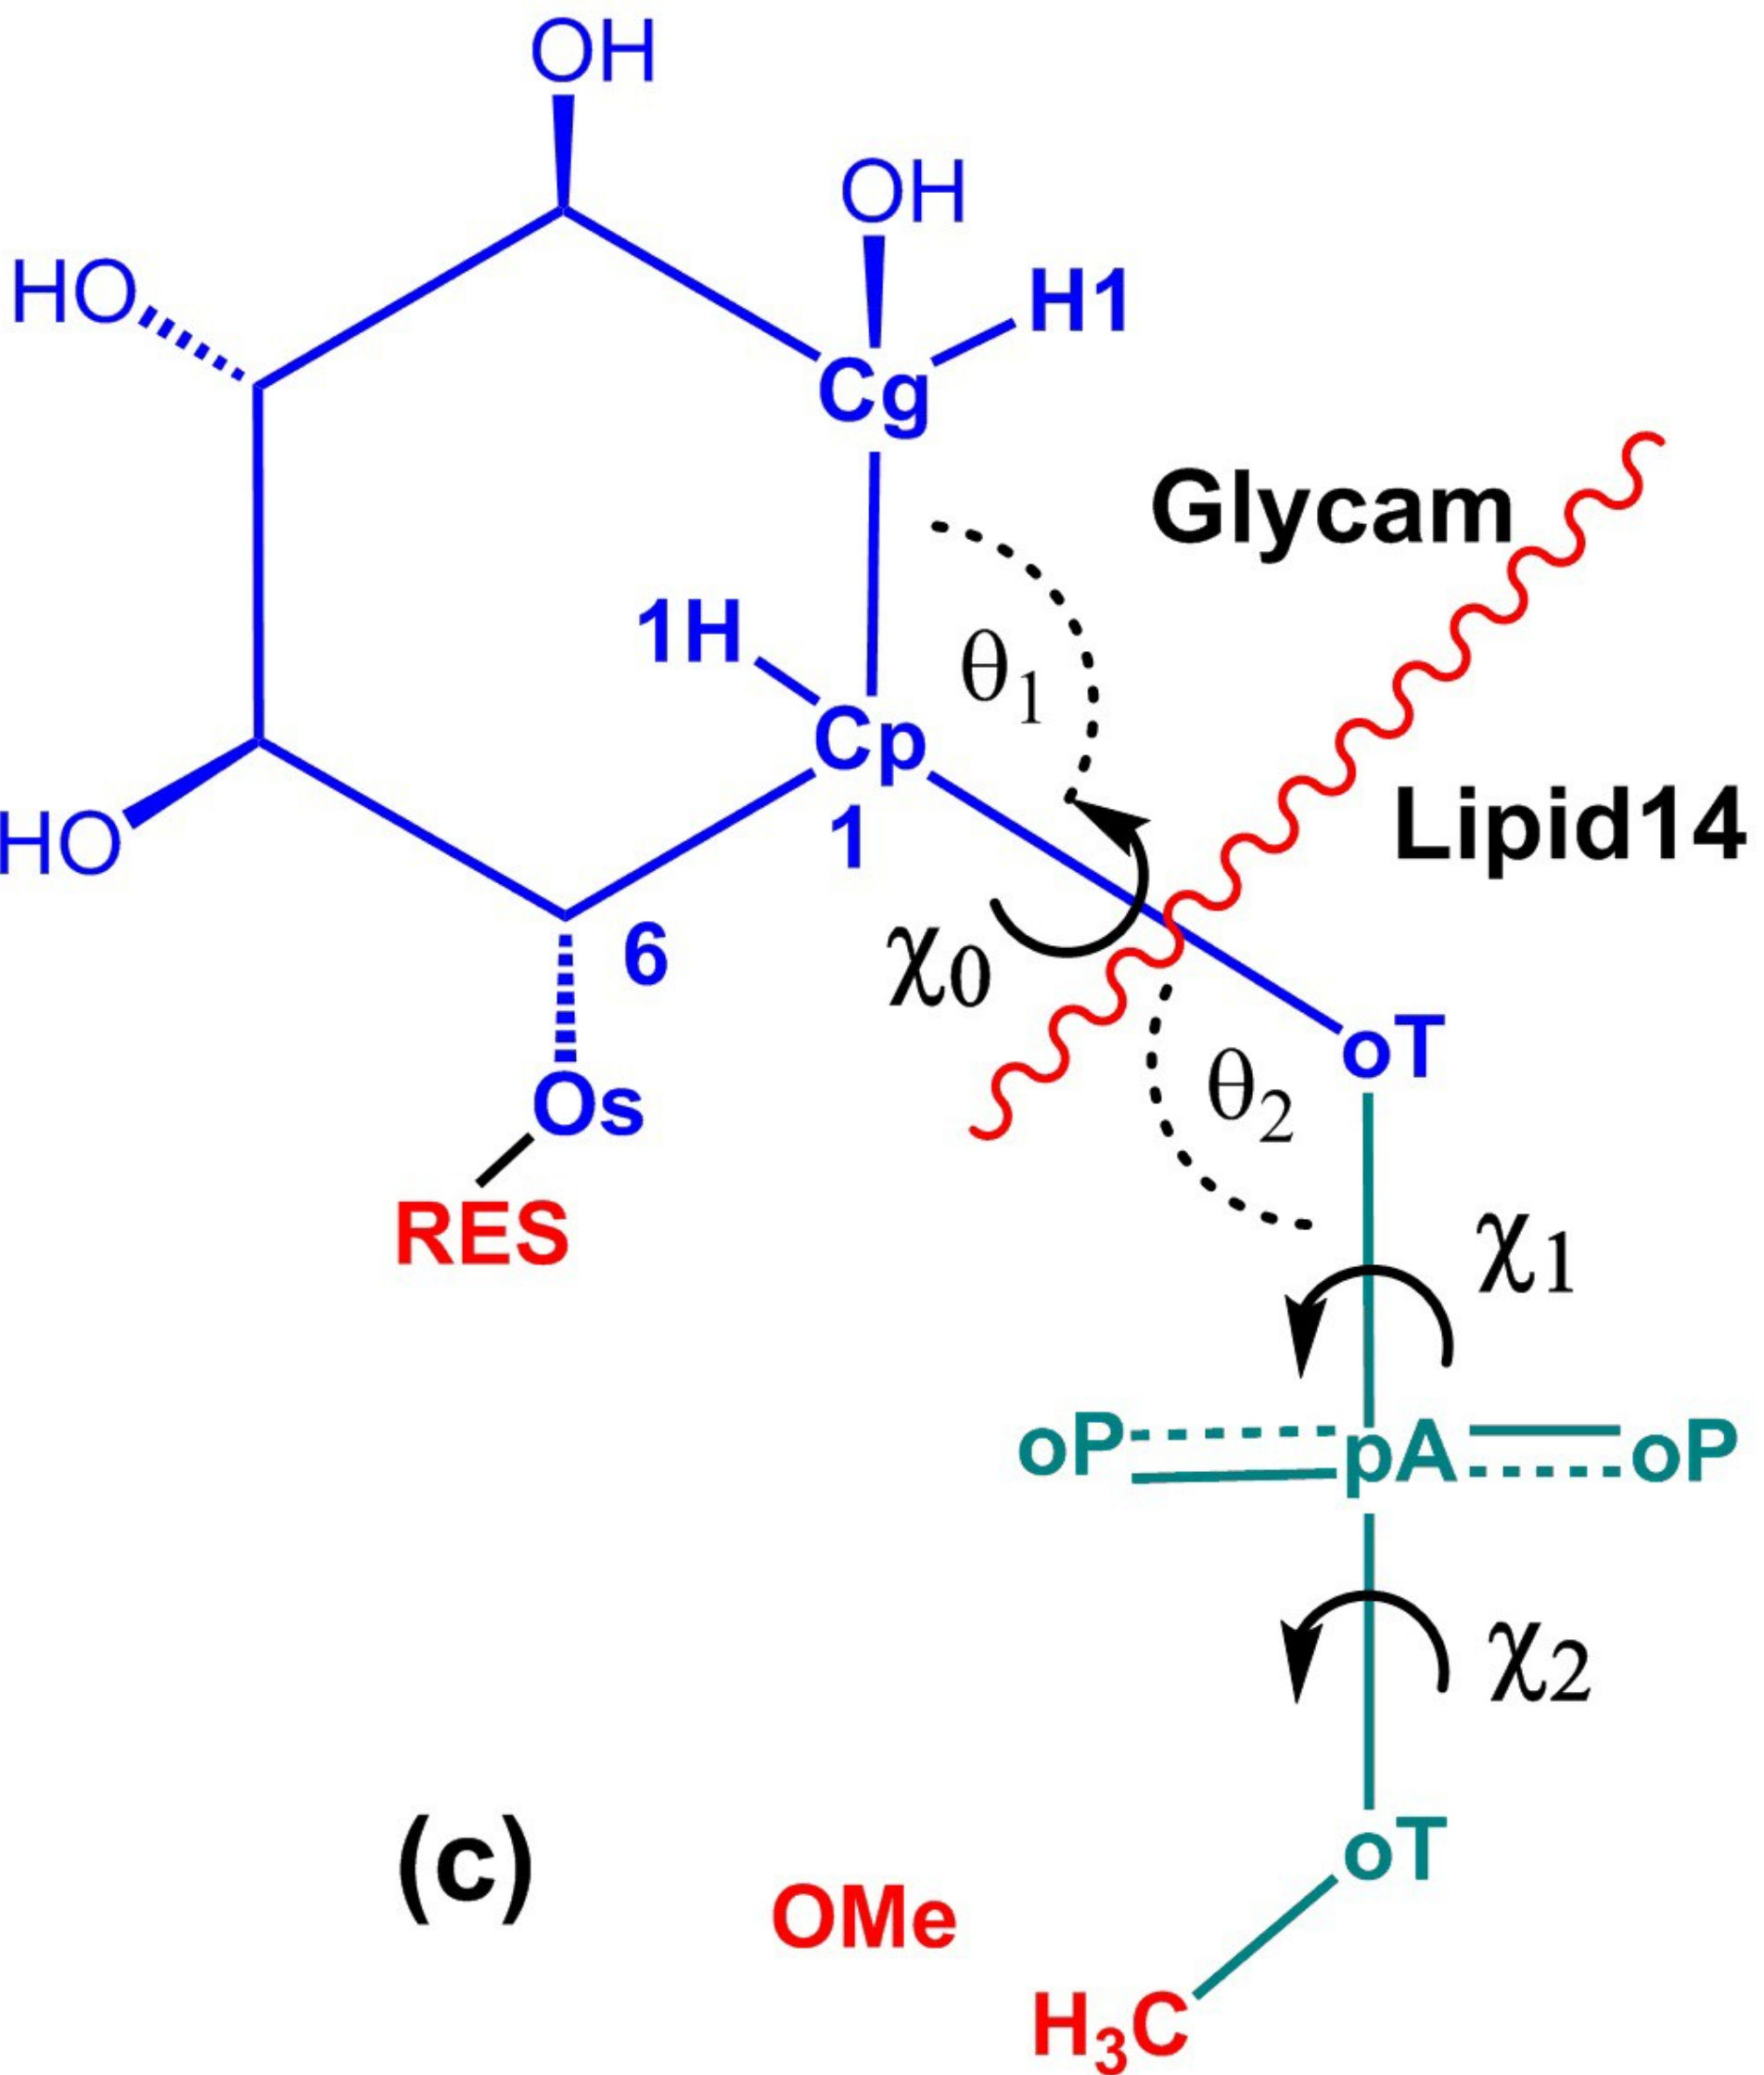

Supplement: c8cp04059a1.pdf [file c8cp04059a1.pdf]

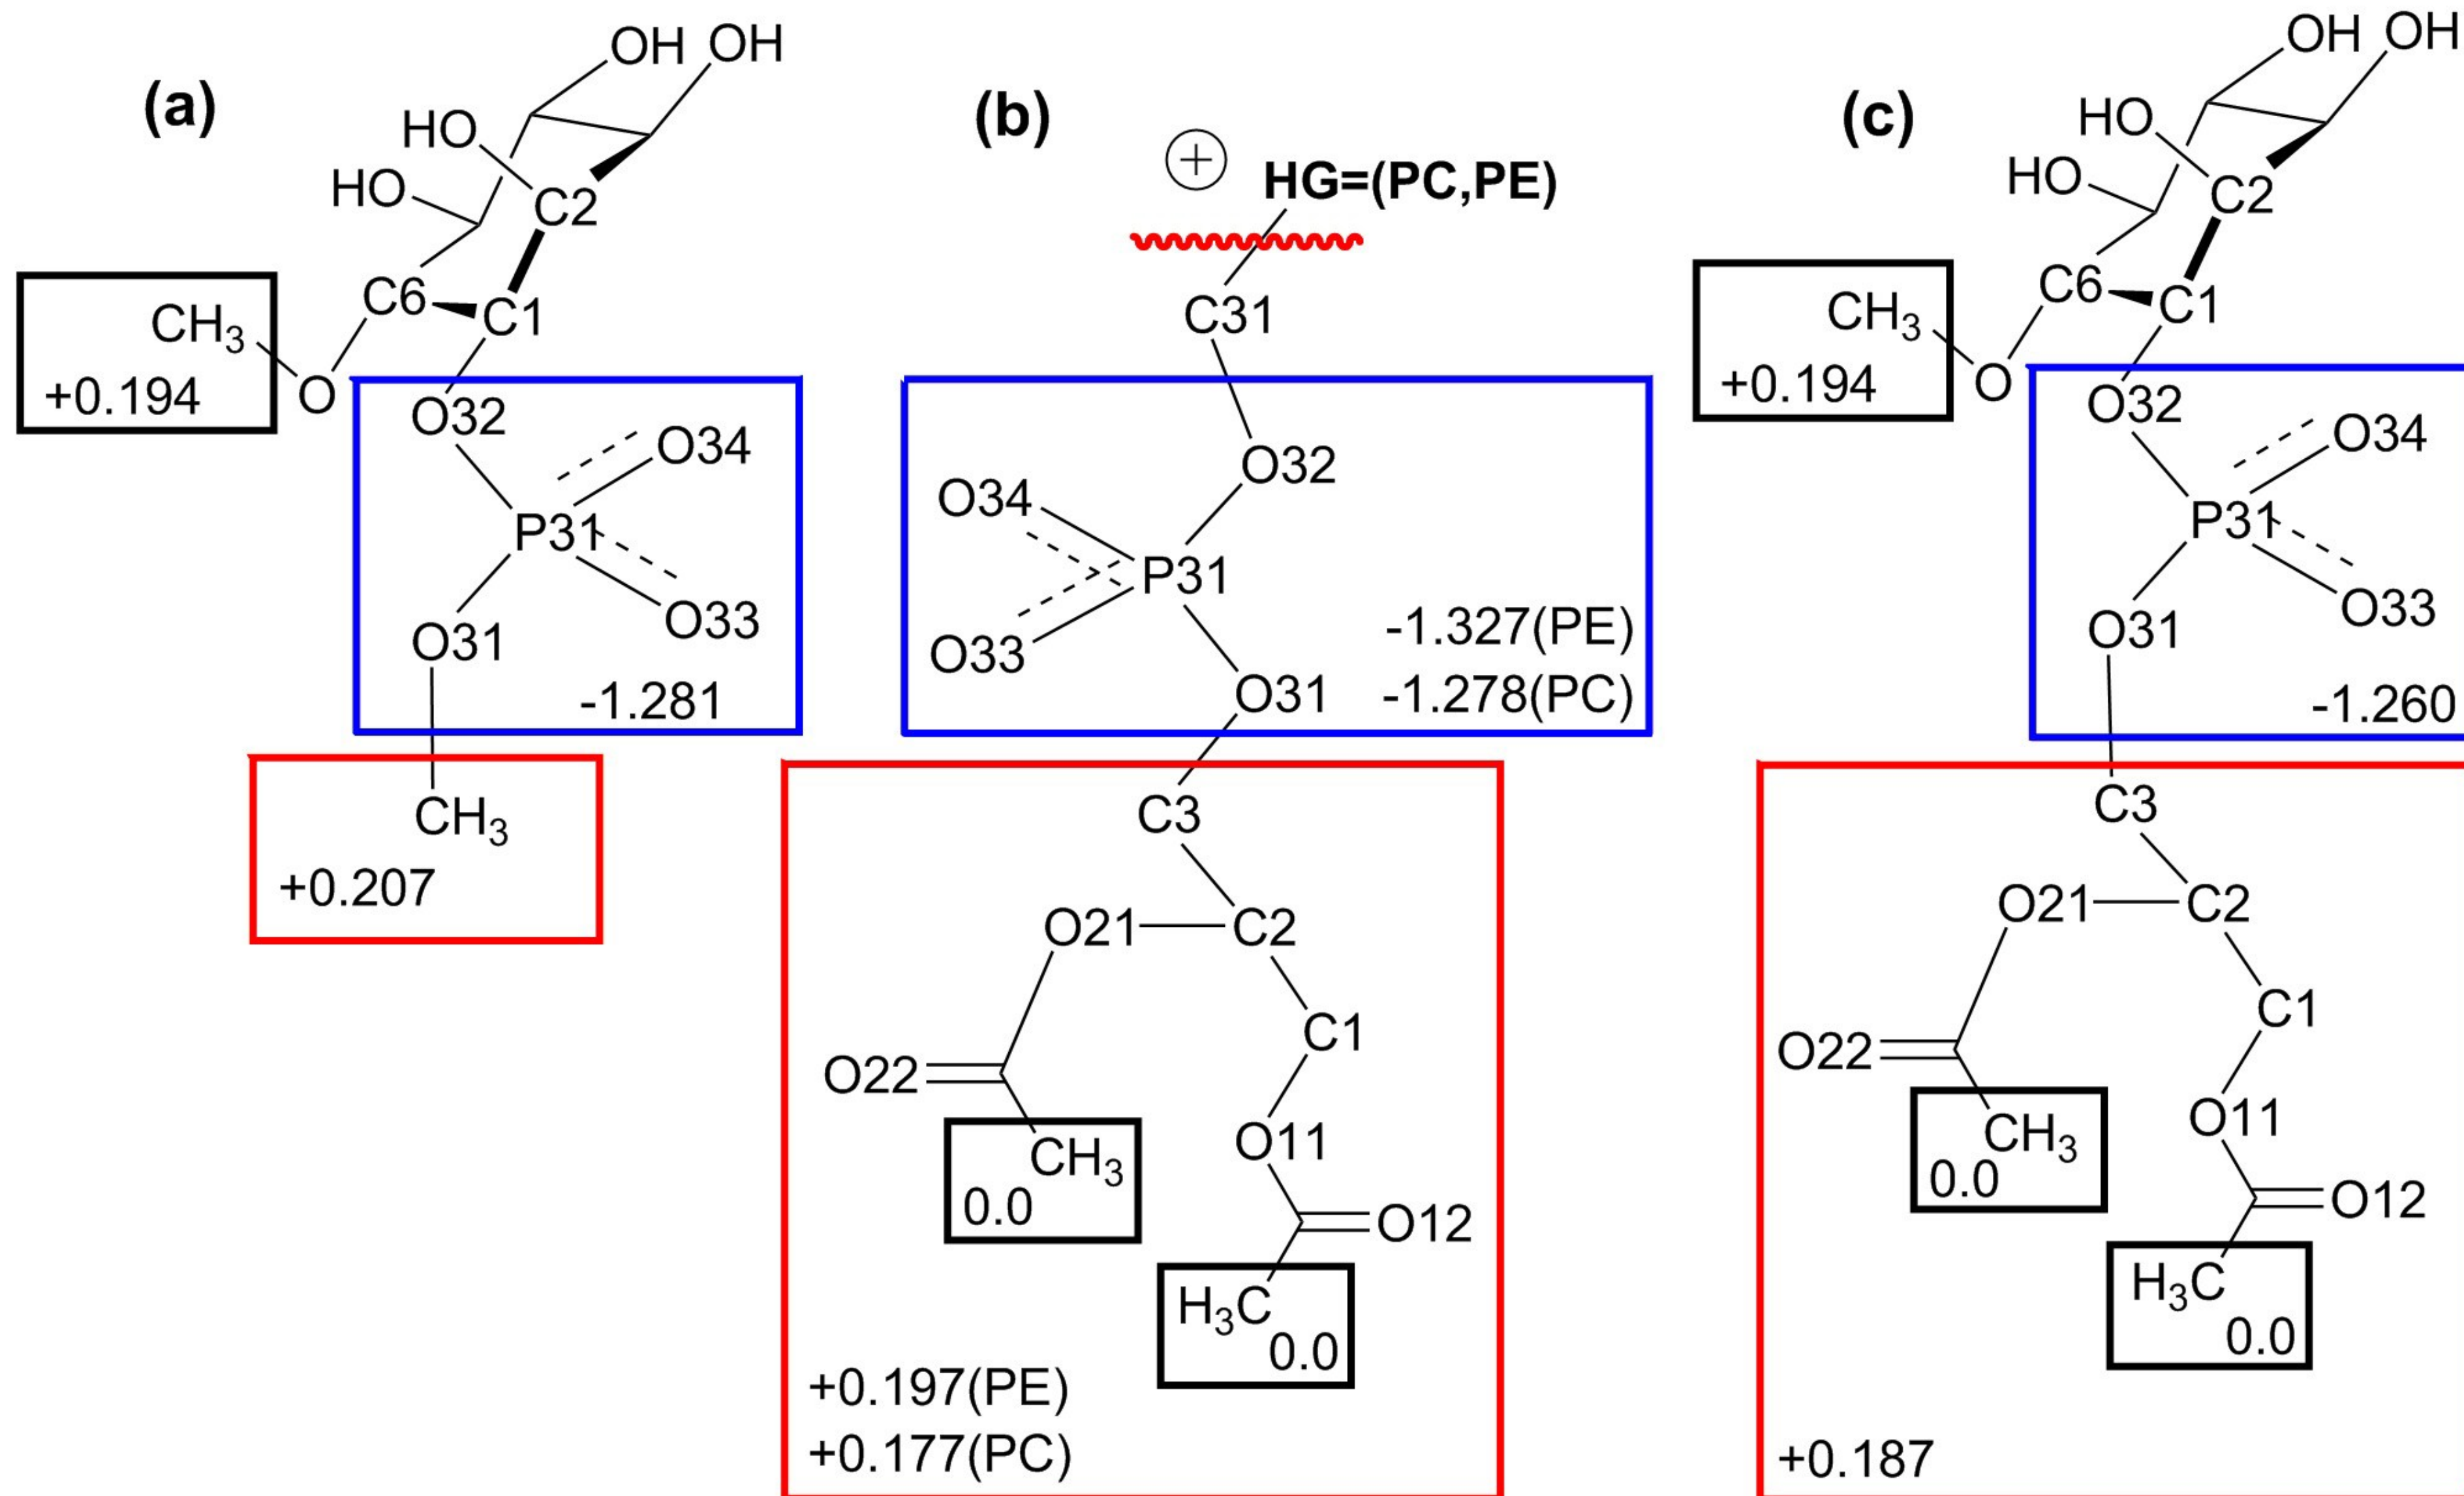

Supplement: c8cp04059a2.pdf [file c8cp04059a2.pdf]

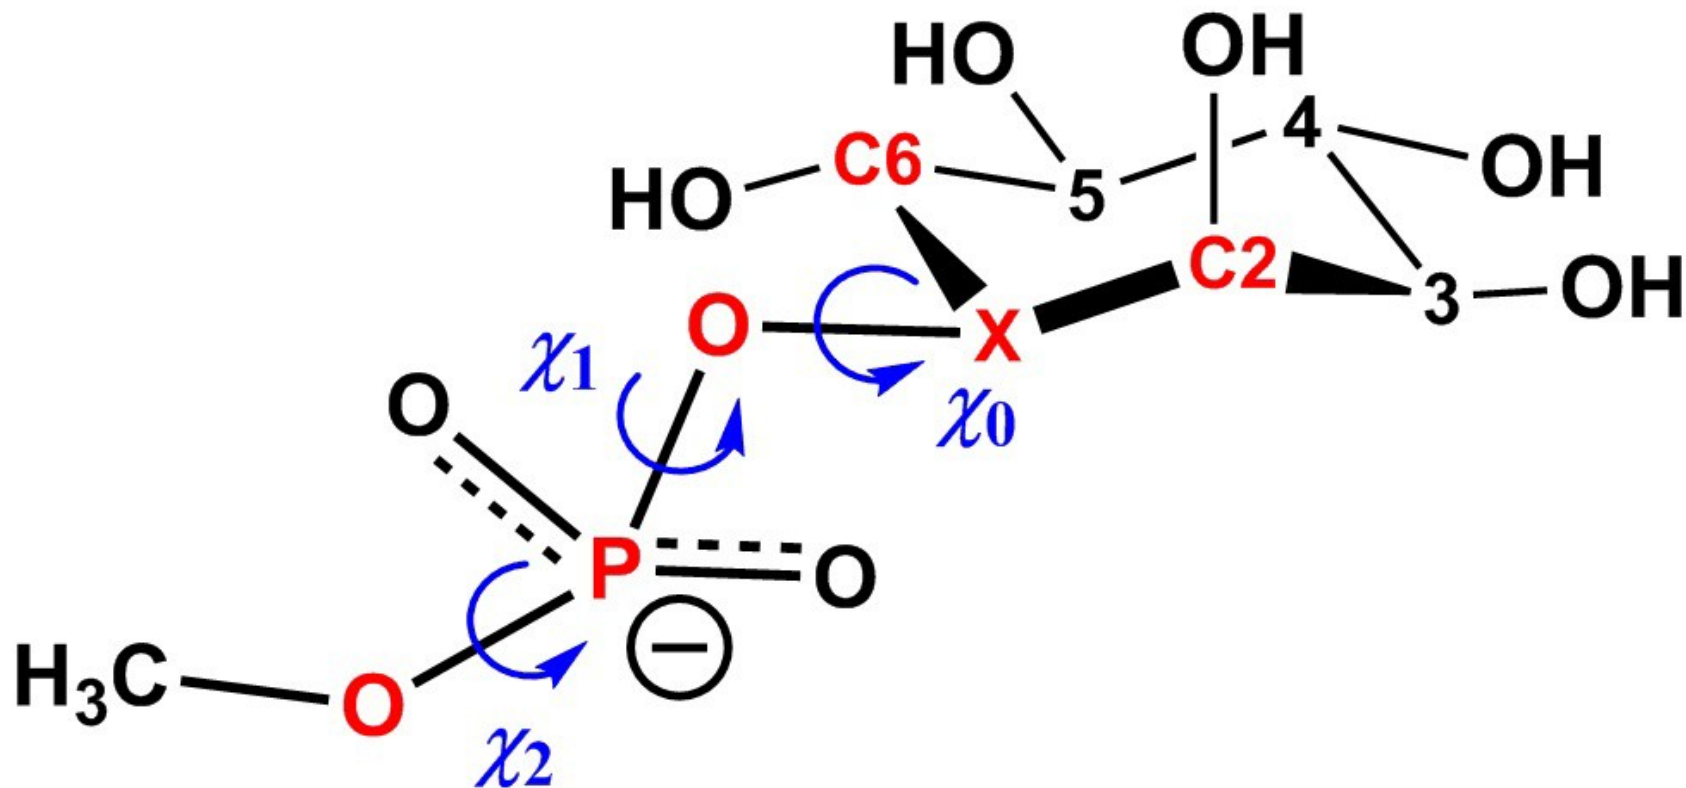

Supplement: c8cp04059a4.pdf [file c8cp04059a4.pdf]

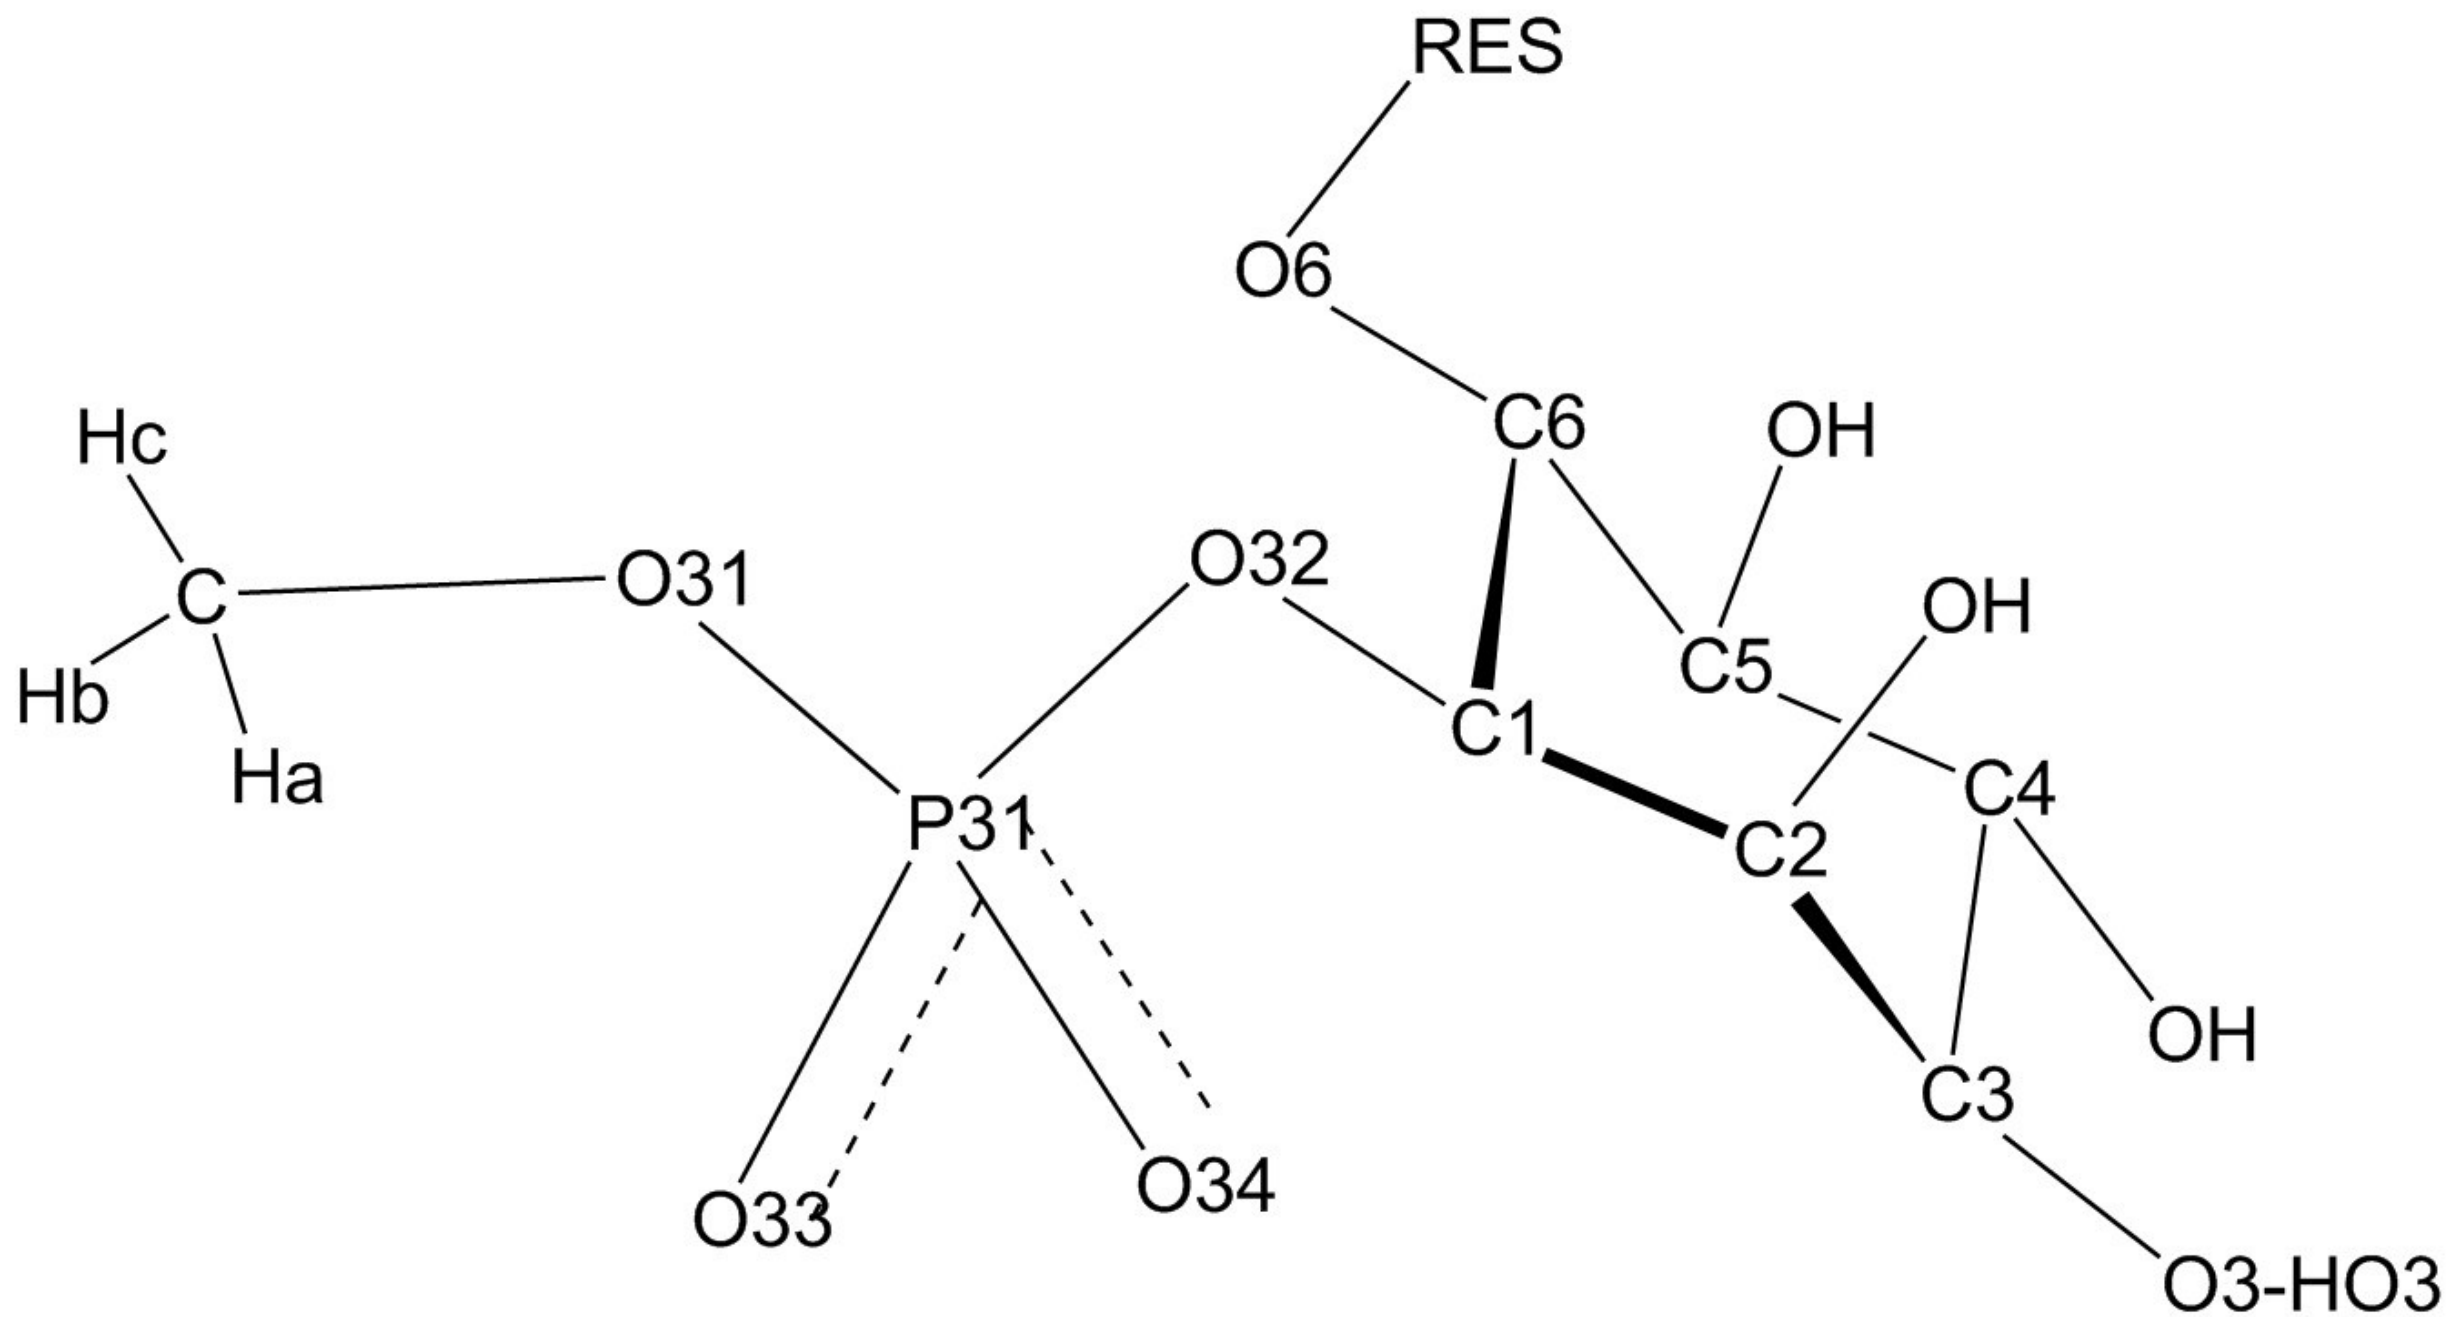

Supplement: c8cp04059a6.pdf [file c8cp04059a6.pdf]

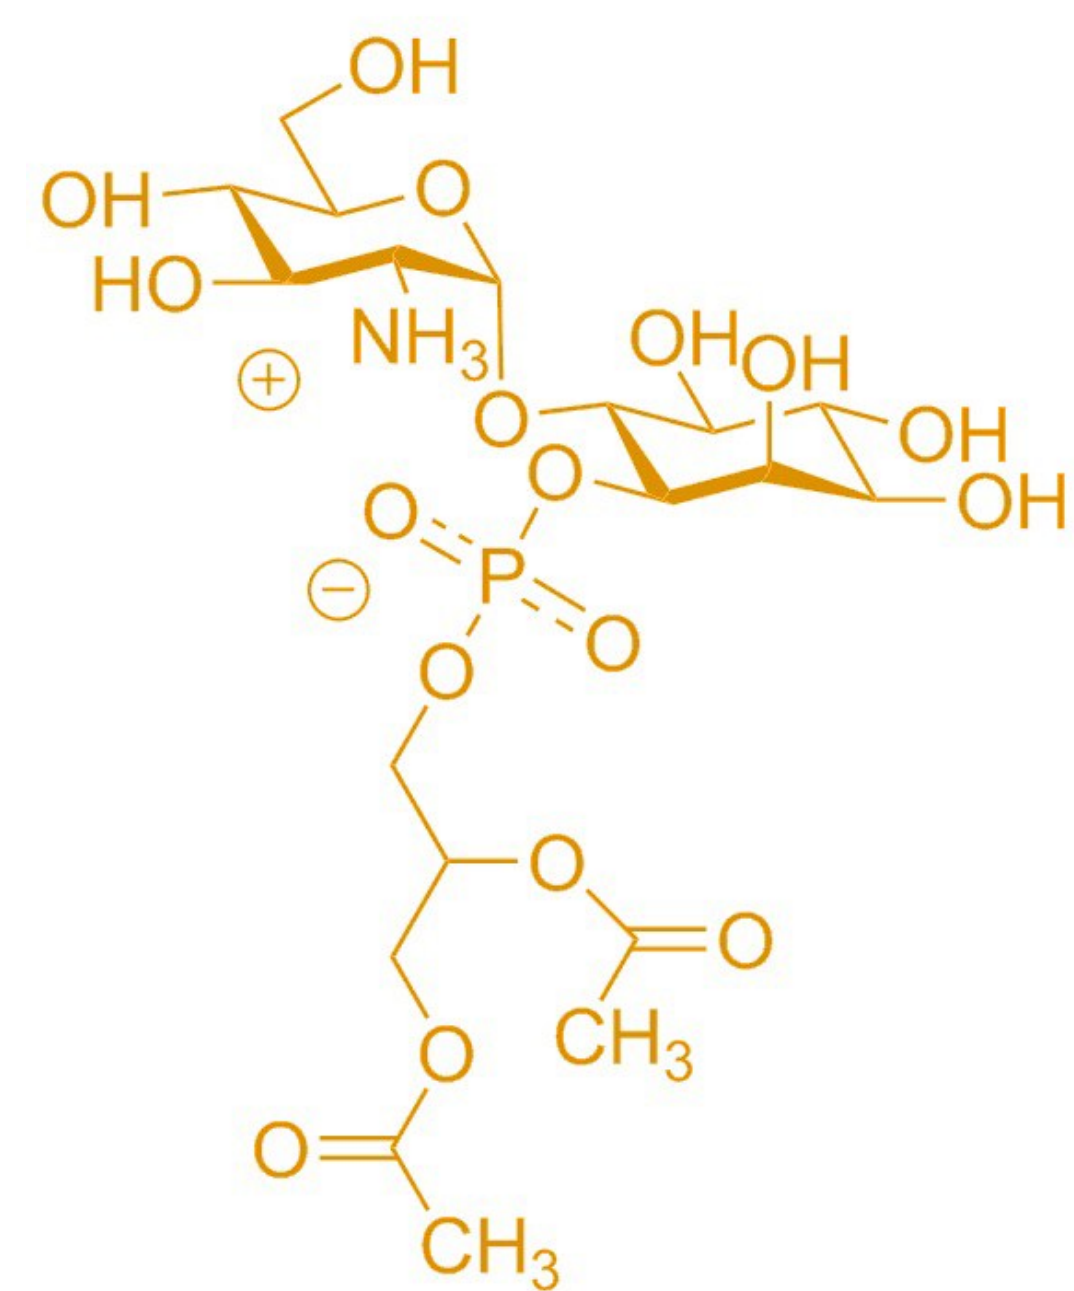

(a)

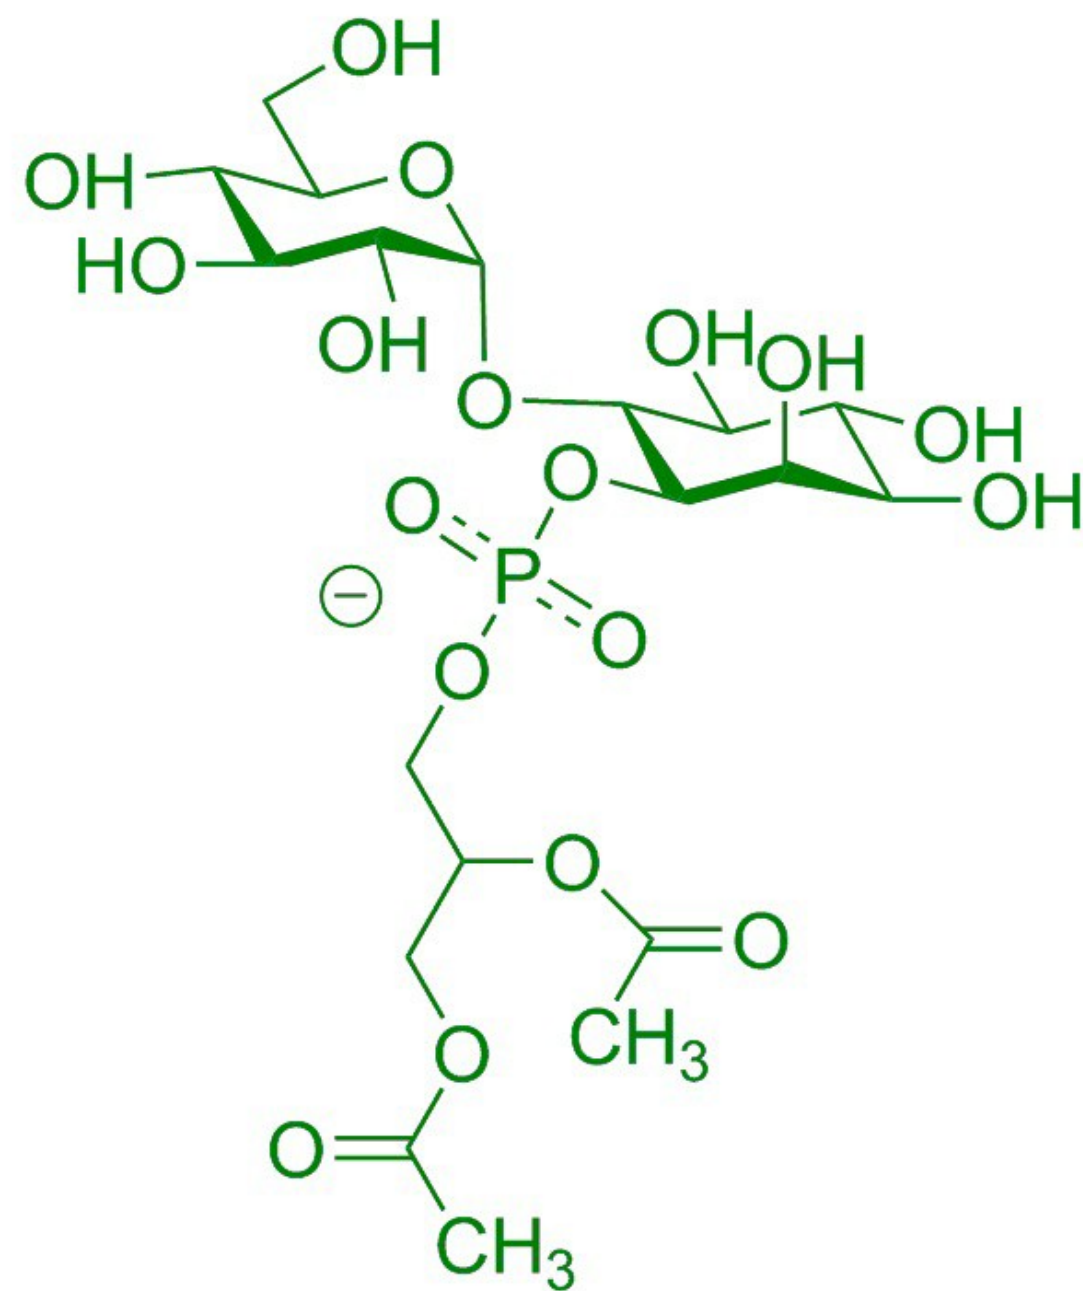

(b)

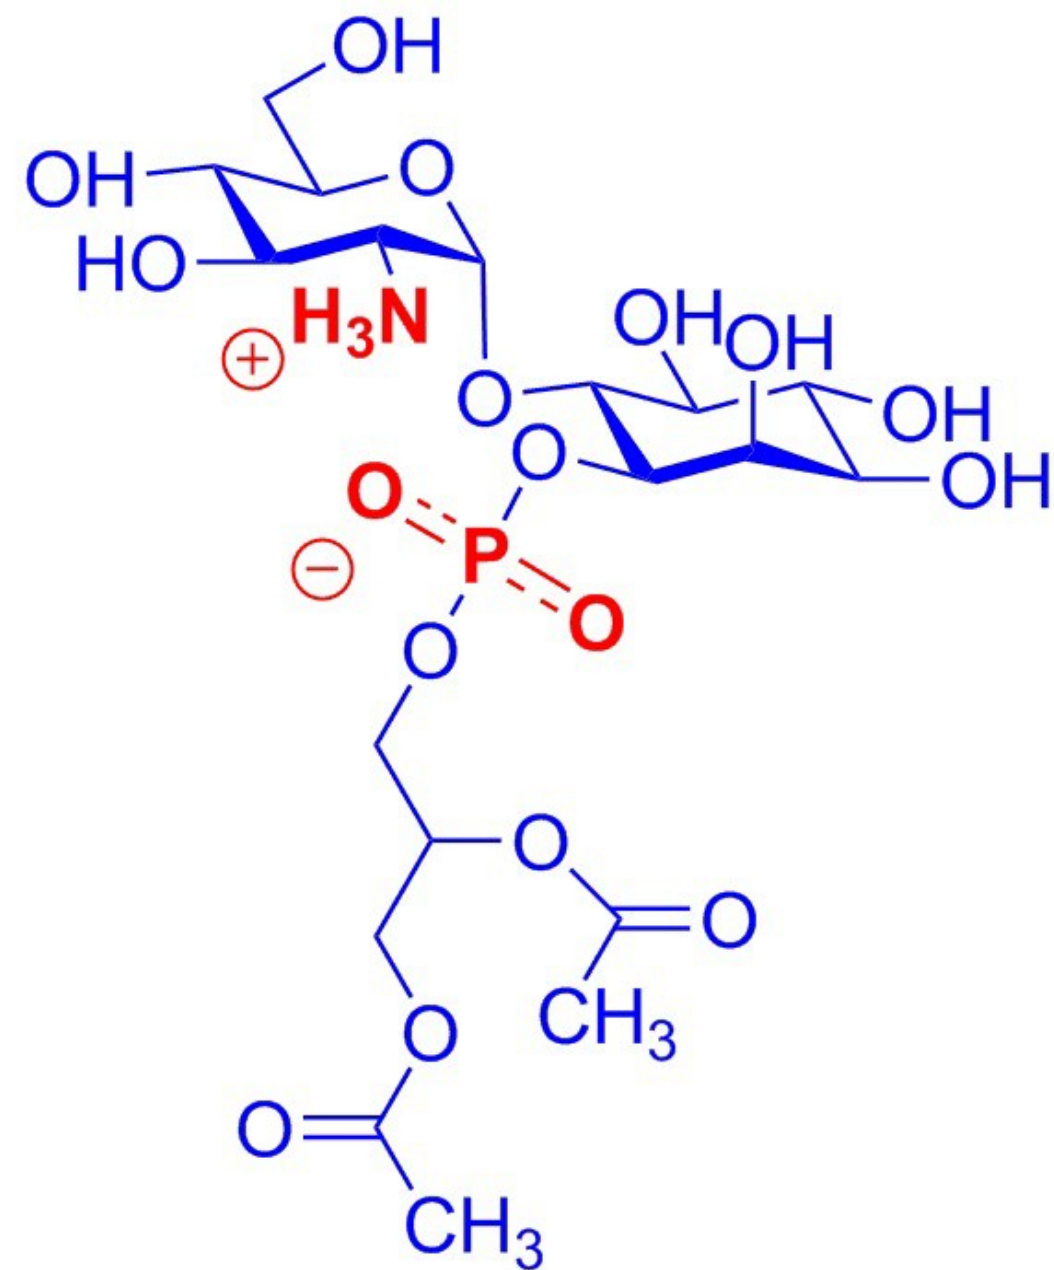

(c)

Supplement: c8cp04059a7.pdf [file c8cp04059a7.pdf]

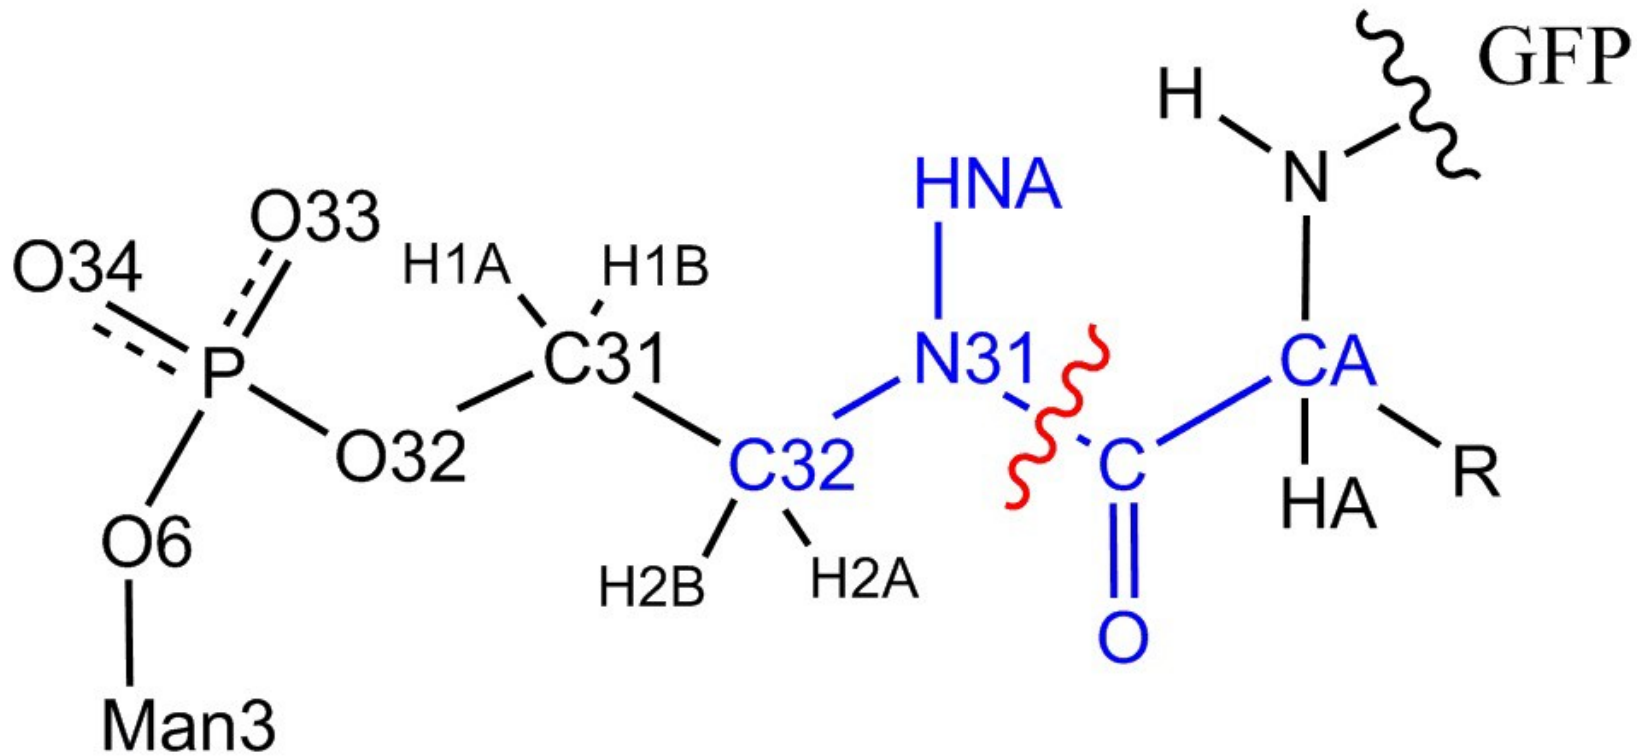

Supplement: c8cp04059a8.pdf [file c8cp04059a8.pdf]
